# Supplementary material for: Integration of miRNA:mRNA Co-Expression Revealed Crucial Mechanisms Modulated in Immunogenic Cancer Cell Death
Source: MDPI journal article supplement (doi:10.3390/biomedicines10081896), 2022-08-05
Supplement: s1 [file s1]

## Supplementary Materials

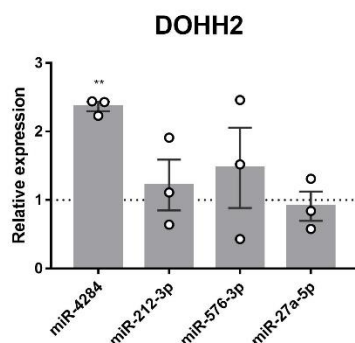

**Figure S1. miRNA modulation during Immunogenic Cell Death in DOHH2 cells.** DOHH2 lymphoma cells were treated with 9-cis Retinoic Acid and Interferon-alpha (RA/IFN $\alpha$ ) for 48 hours. RT-qPCR based quantification of miRNAs expression was performed. Expression values were normalized to U6 snRNA level and referred to control untreated samples (dotted line = 1). Statistical analysis (treated vs untreated cells): One-way ANOVA, Dunnett's multiple comparisons test, \*\*  $p < 0.01$ . Note: miR-7705 was not detected in this cell line.

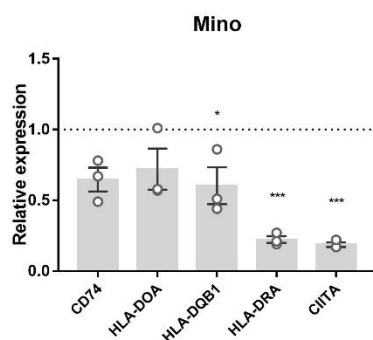

**Figure S2. Modulation of Class II MHC -associated transcripts by Doxorubicin (DXR).** Class II MHC-associated transcripts were evaluated by RT-qPCR in control (untreated) and DXR (ICD inducer)-treated Mino cell lines. Expression values were normalized to GAPDH levels and referred to control untreated samples (dotted line = 1). Statistical analysis (treated vs untreated cells): one-way ANOVA, Dunnett's multiple comparisons test, \*  $p < 0.05$ ; \*\*\*  $p < 0.001$ .

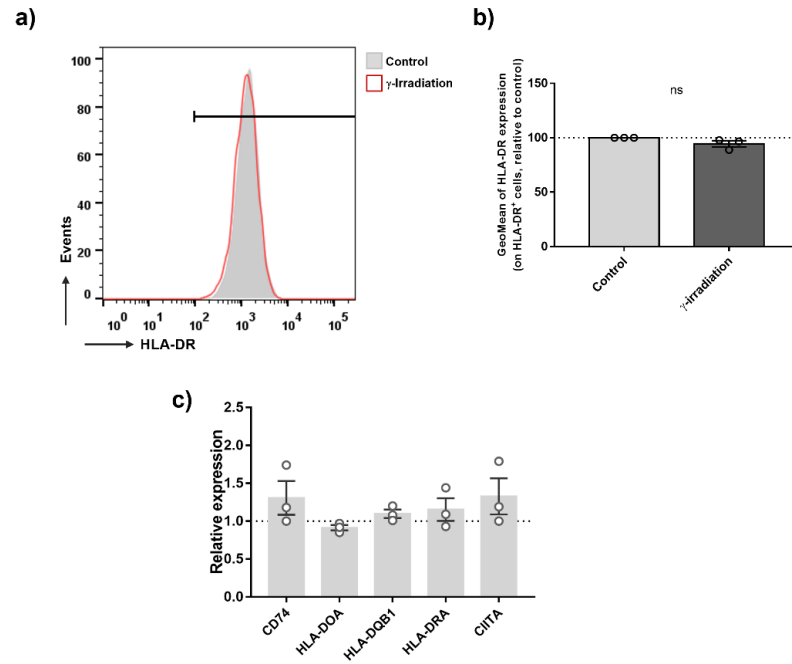

**Figure S3. S. Modulation of Class II MHC pathway by gamma-irradiation ( $\gamma$ -irradiation).** **a)** HLA-DR (MHC-II) surface expression was validated by flow cytometry in control (■ untreated) and  $\gamma$ -irradiated (□ non-ICD inducers) Mino cells. Representative histograms are shown. **b)** HLA-DR surface expression values (GeoMean) were normalized to control untreated samples (dotted line = 1). Statistical analysis (treated vs untreated cells): Student *t*-test, ns = not-significant. **c)** Class II MHC -associated transcripts were evaluated by RT-qPCR in control (untreated)  $\gamma$ -irradiated (□ non-ICD inducers) Mino cells. Expression values were normalized to GAPDH level and referred to control untreated samples (dotted line = 1). Statistical analysis (treated vs untreated cells): one-way ANOVA, Dunnett's multiple comparisons test (not-significant differences were observed). .
